# Supplementary material for: Evaluation of Myocardial Gene Expression Profiling for Superior Diagnosis of Idiopathic Giant-Cell Myocarditis and Clinical Feasibility in a Large Cohort of Patients with Acute Cardiac Decompensation
Source: PubMed Central journal article supplement (PMC7563288; doi:10.3390/jcm9092689), 2020-08-19
Supplement: jcm-09-02689-s001.pdf [file jcm-09-02689-s001.pdf]

## Control group

23 age and gender-matched retrospectively searched out patients without EMB-proven intramyocardial inflammation/viral infection served as a peer group to create the control-group profiling.

**Table S1.** Detailed Endomyocardial Results in Control Group ( $n = 23$ )

| Histological findings             | All          |
|-----------------------------------|--------------|
| - Myocytolysis, $n$               | 0            |
| - Giant cells, $n$                | 0            |
| - Eosinophils, $n$                | 0            |
| - Myocyte diameter, $\mu\text{m}$ | $21.3 \pm 0$ |

| Immunohistological findings                                      | All            |
|------------------------------------------------------------------|----------------|
| - CD3 <sup>+</sup> lymphocytes infiltration/mm <sup>2</sup>      | $3.1 \pm 2.6$  |
| - LFA-1 <sup>+</sup> lymphocytes infiltration/mm <sup>2</sup>    | $7.8 \pm 4.3$  |
| - CD45R0 <sup>+</sup> T memory cell infiltration/mm <sup>2</sup> | $12.2 \pm 8.0$ |
| - perforin <sup>+</sup> cell infiltration/mm <sup>2</sup>        | $0.3 \pm 0.6$  |
| - Mac-1 <sup>+</sup> macrophages infiltration/mm <sup>2</sup>    | $18.6 \pm 7.5$ |

**Note:** CD3 = T lymphocytes; LFA-1 = lymphocyte function-associated antigen-1; CD45R0 (UCHL1) = leucocyte common antigen; perforin = cytotoxic cells; Mac-1 = macrophage-1 antigen.

**Table S2.** Potential marker genes for gene profile development.

| Abbreviation | Gene name                                      | Synonym | RefSeq mRNA ID | RefSeq Protein ID | Uniprot ID | Entrez Gene ID | Reference                                  | Molecular function |
|--------------|------------------------------------------------|---------|----------------|-------------------|------------|----------------|--------------------------------------------|--------------------|
| A4GALT       | Lactosylceramide 4-alpha-galactosyltransferase | P(k)    | NM_017436      | NP_059132         | Q9NPC4     | 53947          | Lassner et al., 2014<br>Kuehl et al., 2013 | M                  |
| ATP5I        | ATP synthase subunit g                         |         | NM_007100      | NP_009031         | P56385     | 521            | Kuehl et al., 2013                         | EM, ce             |
| B3GALT5      | Beta-1,3-galactosyltransferase 5               | GLCT5   | NM_033172      | NP_149362         | Q9Y2C3     | 10317          | Kuehl et al., 2013                         | M                  |

|        |                                                                        |                |                  |                  |            |       |                                                  |           |
|--------|------------------------------------------------------------------------|----------------|------------------|------------------|------------|-------|--------------------------------------------------|-----------|
| BAG5   | BAG family<br>molecular<br>chaperone<br>regulator 5                    |                | NM_004873        | NP_004864        | Q9UL15     | 9529  | Kuehl et al.,<br>2013                            | CC        |
| CCL20  | CC-chemokine<br>ligand 20                                              | ST38           | NM_004591        | NP_004582        | P78556     | 6364  | Lassner et<br>al., 2014<br>Kuehl et al.,<br>2013 | IR        |
| CCR5   | C-C chemokine<br>receptor type 5                                       | IDDM22         | NM_001100<br>168 | NP_0010936<br>38 | P51681     | 1234  | Lassner et<br>al., 2014                          | IR        |
| CCR6   | C-C chemokine<br>receptor type 6                                       | STRL22         | NM_031409        | NP_113597        | P51684     | 1235  | Lassner et<br>al., 2014                          | IR        |
| CDKN1A | cyclin-<br>dependent<br>kinase inhibitor                               | WAF1           | NM_078467        | NP_510867        | P38936     | 1026  | Kuehl et al.,<br>2013                            | CC        |
| CPT1A  | Carnitine<br>palmitoyltransf<br>erase I                                | L-CPT1         | NM_001876        | NP_001867        | P50416     | 1374  | Lassner et<br>al., 2014<br>Kuehl et al.,<br>2013 | M, ce     |
| DHODH  | Dihydroorotate<br>dehydrogenase                                        |                | NM_001361        | NP_001352        | Q02127     | 1723  | Lassner et<br>al., 2014<br>Kuehl et al.,<br>2013 | EM,<br>mt |
| FOXP3  | Forkhead box<br>P3                                                     | XPID           | NM_014009        | NP_054728        | Q9BZS1     | 50943 | Lassner et<br>al., 2014<br>Kuehl et al.,<br>2013 | IR        |
| GBGT1  | Globoside<br>alpha-1,3-N-<br>acetylgalactosa<br>minyltransferas<br>e 1 | UDP-<br>GalNAc | NM_021996        | NP_068836        | Q8N5D6     | 26301 | Kuehl et al.,<br>2013                            | M         |
| IFNB1  | Interferon beta<br>1                                                   | IFNB           | NM_002176        | NP_002167        | P01574     | 3456  | Kuehl et al.,<br>2013                            | IR        |
| IL10   | Interleukin 10                                                         | IL10A          | NM_000572        | NP_000563        | P22301     | 3586  | Lassner et<br>al., 2014<br>Kuehl et al.,<br>2013 | IR        |
| IL17D  | Interleukin 17D                                                        | IL-17D         | NM_138284        | NP_612141        | Q8TAD<br>2 | 53342 | Lassner et<br>al., 2014                          | IR        |
| IL6R   | Interleukin 6<br>receptor                                              | CD126          | NM_181359        | NP_852004        | P08887     | 3570  | Lassner et<br>al., 2014<br>Kuehl et al.,<br>2013 | IR        |
| MT-CYB | Cytochrome b                                                           | UQCR3          |                  | YP_0030240<br>38 | P00156     | 4519  | Kuehl et al.,<br>2013                            | EM,<br>mt |
| MT-ND1 | NADH<br>ubiquinone<br>oxidoreductase<br>core subunit 1                 | NAD1           |                  | YP_0030240<br>26 | P03886     | 4535  | Lassner et<br>al., 2014                          | EM,<br>mt |

|         |                                               |        |              |              |        |       |                      |        |
|---------|-----------------------------------------------|--------|--------------|--------------|--------|-------|----------------------|--------|
| MT-ND4  | NADH ubiquinone oxidoreductase core subunit 4 | ND4    |              | YP_003024035 | P03905 | 4538  | Lassner et al., 2014 | EM, mt |
| NDUFS1  | NADH-ubiquinone oxidoreductase 75 kDa subunit | CI-75k | NM_005006    | NP_004997    | P28331 | 4719  | Kuehl et al., 2013   | EM, ce |
| POLG    | DNA polymerase subunit gamma                  | POLGA  | NM_002693    | NP_002684    | P54098 | 5428  | Kuehl et al., 2013   | EM, ce |
| SLC25A5 | ADP/ATP translocase 2                         | T3     | NM_001152    | NP_001143    | P05141 | 292   | Kuehl et al., 2013   | EM, ce |
| SOD2    | Superoxide dismutase 2                        |        | NM_001322817 | NP_001309749 | P04179 | 6648  | Kuehl et al., 2013   | EM, ce |
| TLR8    | Toll-like receptor 8                          | CD288  | NM_138636    | NP_619542    | Q9NR97 | 51311 | Lassner et al., 2014 | IR     |
| TLR9    | Toll-like receptor 9                          | CD289  | NM_017442    | NP_059138    | Q9NR96 | 54106 | Lassner et al., 2014 | IR     |
| TNF     | Tumor necrosis factor                         | TNFSF2 | NM_000594    | NP_000585    | P01375 | 7124  | Lassner et al., 2014 | IR     |
| UQCR    | Ubiquinol-cytochrome c reductase              | UQCR   | NM_006830    | NP_006821    | O14957 | 10975 | Lassner et al., 2014 | EM, ce |

**Note:** M = metabolism; EM = energy metabolism; ce = chromosomally encoded gene; CC = cell cycle regulation; IR = immune response; Major molecular function and chromosomal (cs) or mitochondrial (mt) genome localization of mitochondrial genes are indicated.

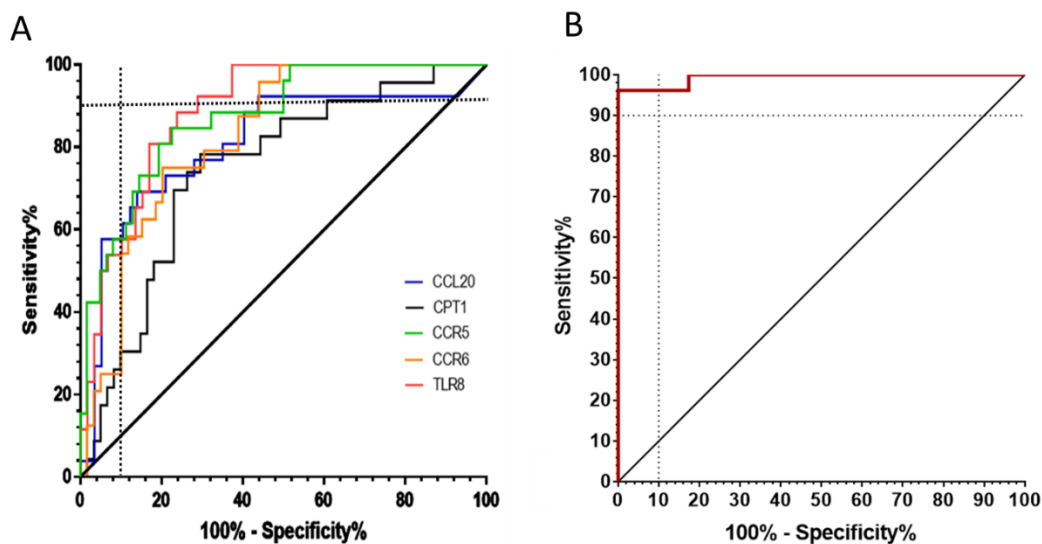

**Figure S1.** Gene profile performance analysis for IGCM detection. (A) Single gene profile performance analysis of each marker gene to detect IGCM and (B) gene profile performance of final gene profile is demonstrated by ROC. Solid black line represents chance level. Dotted lines indicate 90 % specificity and 90 % sensitivity threshold levels. Detailed information on single gene performance and integrated profile for detection of IGCM are given in Table S3.

**Table S3.** ROC of gene profile performance analysis for IGCM detection.

| Genes | AUC    | SE      | 95% CI           |
|-------|--------|---------|------------------|
| CCL20 | 0.807  | 0.05739 | 0.6945 to 0.9195 |
| CCR5  | 0.8722 | 0.03909 | 0.7956 to 0.9488 |
| CCR6  | 0.8249 | 0.04538 | 0.7359 to 0.9138 |

|                    |        |         |                  |
|--------------------|--------|---------|------------------|
| <i>CPT1</i>        | 0.7463 | 0.05867 | 0.6313 to 0.8612 |
| <i>TLR8</i>        | 0.8866 | 0.03466 | 0.8186 to 0.9545 |
| Final gene profile | 0.9933 | 0.00782 | 0.978 to 1.009   |

**Table S4.** EMB-Based Diagnostic Findings for the Entire Study Group.

| <b>Patient Category</b>    | <b>Total</b> |
|----------------------------|--------------|
| Entire Cohort ( <i>n</i> ) | 427          |
| IGCM                       | 57           |
| AMC                        | 40           |
| DCMi                       | 194          |
| EOM                        | 4            |
| Cardiac sarcoidosis        | 5            |
| DCM                        | 147          |

**Viral PCR Analysis of DCMi Patients.**

| <b>Patient Category</b>    | <b>Total</b> |
|----------------------------|--------------|
| Entire Cohort ( <i>n</i> ) | 194          |
| Coxsackievirus             | 0            |
| Enterovirus                | 1            |
| Human Herpes Virus 6       | 24           |
| Epstein-Barr Virus         | 4            |
| Erythrovirus               | 78           |

**Note:** IGCM = idiopathic giant cell myocarditis; AMC = acute myocarditis; DCMi = dilated inflammatory cardiomyopathy; EOM = eosinophilic myocarditis; DCMi = inflammatory dilated cardiomyopathy. The data are presented as No. of subjects.

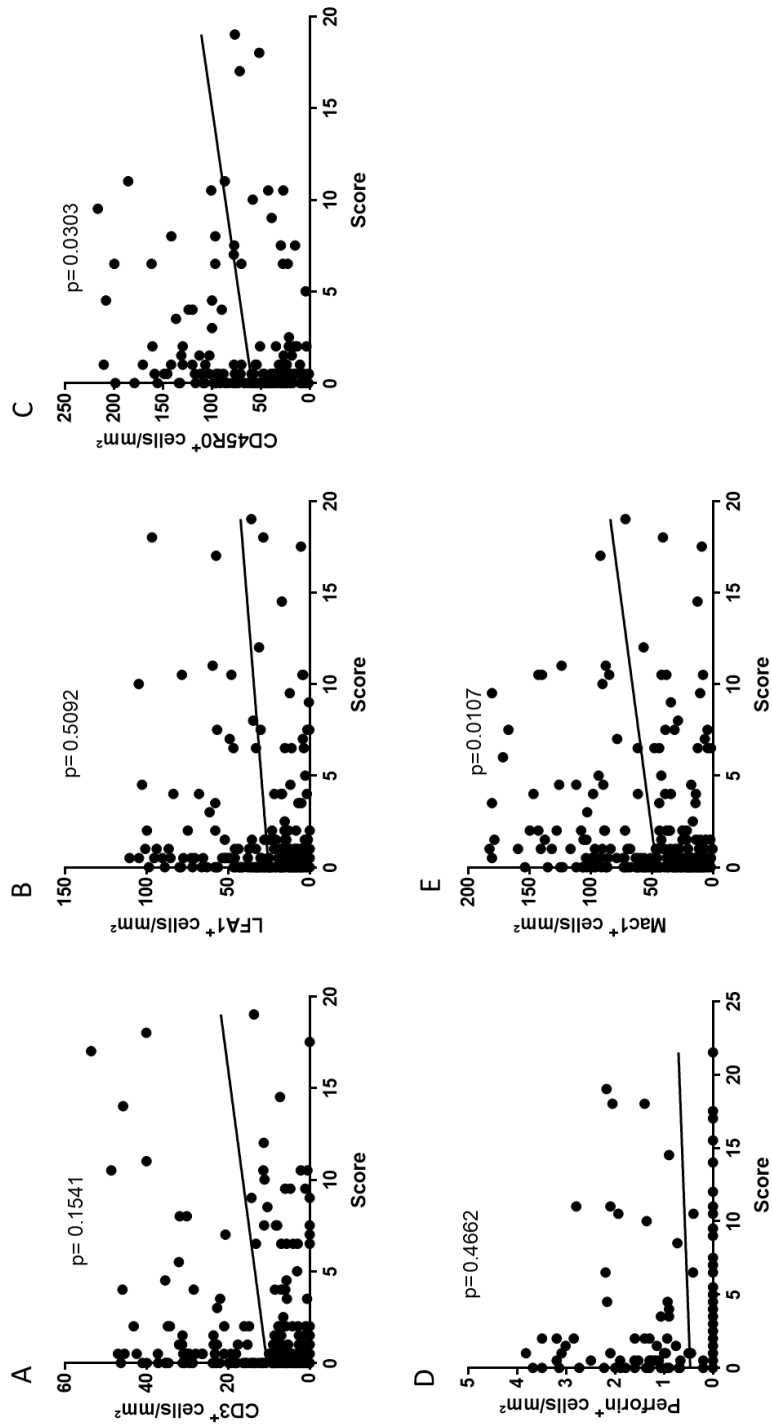

**Figure S2** Correlation of IGCM-specific gene-expression profile score with the number of digitallly measured immune cells in EMBs in the total patient cohort. Correlation of (A) CD3<sup>+</sup>, (B) LFA-1<sup>+</sup>, (C) CD45<sup>+</sup>, (D) perforin<sup>+</sup>, and (E) Mac-1<sup>+</sup>-cells with computed gene-profiling score is shown. **Note:** Immunohistological marker: CD3 = T-lymphocytes, LFA-1 = leukocyte function antigen-1, Mac-1 = macrophage-1 antigen, CD45R0 (UCHL1) = leukocyte common antigen, perforin = cytotoxic cells. *P*-values are indicated.
